# Supplementary material for: Cascabel: A Scalable and Versatile Amplicon Sequence Data Analysis Pipeline Delivering Reproducible and Documented Results
Source: Front Genet. 2020 Nov 20;11:489357. doi: 10.3389/fgene.2020.489357 (PMC7718033; doi:10.3389/fgene.2020.489357)
Supplement: Supplementary Datasheet 10—Config files of mock community analyses — Config files of the Cascabel runs performed on the mock community datasets as listed in Supplementary Datasheet 8. [file Data_Sheet_10.ZIP]

Archive with 3 entries (3 files):
- 16S_configFiles.zip
- 18Smock_configFiles.zip
- ITSmock_configFiles.zip
